# Supplementary material
Source: publisher figshare collection journal article supplement (https://frontiersin.figshare.com/ndownloader/files/15966515)
Supplement: Supplementary file [file 15966515]

| Age & Sex & Strain                            | Dose & Exposure Time                                              | Exposure Control                                                                                                              | Behavioral test/Questionnaires  | Behavioral/Pharmacological/Physiological outcomes                                                                                                                                                                 | Reference                      | Quality Index |
|-----------------------------------------------|-------------------------------------------------------------------|-------------------------------------------------------------------------------------------------------------------------------|---------------------------------|-------------------------------------------------------------------------------------------------------------------------------------------------------------------------------------------------------------------|--------------------------------|---------------|
| Adulthood<br>M 100%<br>LE                     | DFP 1mg/kg,<br>Disulfoton<br>2mg/kg/day for<br>14 days            | AChE activity from different<br>brain areas                                                                                   | Spontaneous<br>alternation test | Compulsivity, perseveration, working memory- Exposed > CNT // Muscarinic binding<br>at cortex, hippocampus and striatum- Exposed < CNT                                                                            | McDonald et al.,<br>1988       | H+            |
| PND22-24;<br>61-91<br>M 50%<br>SD             | CPF 0.3, 1 - 5<br>mg/kg<br>GD6-PND10                              | CPF levels in blood and<br>milk; TCP levels in blood;<br>ChE activity erythrocytes,<br>heart and brain; Functional<br>battery | DAT                             | Compulsivity, perseveration- Exposed = CNT                                                                                                                                                                        | Maurissen et al.,<br>2000      | H?            |
| PNM4<br>M100%<br>WR                           | CPF 166-<br>250mg/kg<br>Px 0.4-1mg/kg<br>PNW16 & 38               | ChE activity; Functional<br>battery                                                                                           | DAT                             | 1 exposure- Compulsivity, perseveration & learning - Exposed = CNT // 2 exposure-<br>Task performance- Exposed < CNT at early days // Compulsivity, perseveration- no<br>specification // Motor- Heavily affected | Sánchez-Santed<br>et al., 2004 | H+            |
| PND35<br>M 50%<br>SD                          | PTN 0.1-0.2<br>mg/kg/day<br>from PND1-4                           | Functional battery                                                                                                            | Alternation task                | Learning, attention, Compulsivity, perseveration- Exposed = CNT Motor- Exposed =<br>CNT                                                                                                                           | Timofeeva et al.,<br>2008      | H+            |
| PNM5,17<br>M 100%<br>WR                       | CPF 250 mg/kg<br>acute at PNM3                                    | AChE activity whole brain &<br>functional battery                                                                             | DDT; SIP                        | Impulsive choice- Exposed > CNT (Short-term) // Exposed HD > rest (long-term) //<br>Compulsivity, adjunctive behavior- Exposed > CNT                                                                              | Cardona et al.,<br>2011        | MH+           |
| Adulthood<br>M 100%<br>WR                     | CPF 5<br>mg/kg/day for<br>31 weeks                                | AChE activity from half<br>hemisphere; Functional<br>battery                                                                  | DDT                             | Impulsive choice- Exposed > CNT // AChE-R Expression > CNT                                                                                                                                                        | Lopez-Granero<br>et al., 2013  | MH+           |
| PNM6-14<br>M 100%<br>WR                       | CPF 250 mg/kg<br>DFP 1.5 mg/kg<br>PTN 15 mg/kg<br>PNM3            | AChE-S activity; Functional<br>battery                                                                                        | DDT                             | Impulsive choice- Exposed = CNT // Short-term AChE-S expression- Exposed < CNT<br>// Long-term AChE-R expression- Exposed (CPF/DFP) < CNT                                                                         | Lopez-Granero<br>et al., 2014  | MH-           |
| PNW≈9<br>M 100%<br>LH                         | CPF/ DZN<br>1 mg/kg for 5<br>days                                 | AChE activity in different<br>brain structures and blood                                                                      | MBT                             | Compulsivity- Exposed < CNT // DA levels frontal & Striatum- Exposed < CNT //<br>5HT-T levels Frontal and Hippocampus- Exposed < CNT                                                                              | Savy et al., 2015              | MH+           |
| Adulthood<br>F 100%<br>APOE2, 3<br>and 4 mice | CPF 3.75<br>mg/kg/day<br>dietary for 4<br>weeks after BL          | ChE activity both plasma<br>and FC                                                                                            | 5-CSRTT                         | CPF exposure. Impulsive action- Exposure < BL // Compulsivity, perseveration- CPF<br>blocked APOE4 increased perseveration at BL // GABA agonist (Alprazolam) did not<br>affect impulsive/compulsive traits       | Peris-Sampedro<br>et al., 2016 | MH-           |
| > 3 m.o.<br>M100%<br>WR                       | DFP 0.5<br>mg/kg/day<br>PNM3-4 30<br>consecutive<br>days exposure | Functional battery; plasma<br>and whole brain ChE activity                                                                    | 5-CSRTT                         | Impulsive action- Exposed < CNT (exposure period) larger ITI; Exposed > CNT<br>(Washout period) larger ITI // Compulsivity, inflexibility- Exposed > CNT<br>(Exposure/Wash-out), stronger at lower SD (Exposure)  | Terry et al., 2014             | MH+           |
| Adulthood<br>M 100%<br>LH                     | DZN 1 and<br>2mg/kg/day, 5                                        | A/BuChE activity in<br>different brain structures and<br>blood                                                                | MBT                             | Compulsivity- Exposed < CNT                                                                                                                                                                                       | Savy et al., 2018              | MH+           |

|                              |                                                          |                                                |                              |                                                                                                                                                                                                                                                                |                                |    |
|------------------------------|----------------------------------------------------------|------------------------------------------------|------------------------------|----------------------------------------------------------------------------------------------------------------------------------------------------------------------------------------------------------------------------------------------------------------|--------------------------------|----|
|                              | days/week, 12 weeks                                      |                                                |                              |                                                                                                                                                                                                                                                                |                                |    |
| Adulthood<br>M 100%<br>LE    | DFP 1 + 0.5 mg/kg                                        | AChE activity from brain cortex                | Discrimination reversal task | Compulsivity, inflexibility- DFP + Scopolamine > Saline + Scopolamine //                                                                                                                                                                                       | Raffaele et al., 1990          | M? |
| PNM9<br>M 100%<br>WR         | CPF 250 mg/kg acute at PNM3                              | AChE activity whole brain & functional battery | SIP; DDT                     | Impulsive choice- Exposed > CNT; Exposed HD > CNT HD // Compulsivity, adjunctive behavior- Exposed HD > CNT HD; GABA agonist increased compulsivity only in CPF HD.                                                                                            | Cardona et al., 2006           | M+ |
| PNM2<br>M 100%<br>WR         | CPF 18 mg/kg. sub chronic 14 or 30 consecutive days PNM2 | ChE activity different brain areas             | 5-CSRTT                      | 14 d.e. Impulsive action- Exposed > CNT (always) // Compulsivity, perseveration- Exposed < CNT (exposure period)<br>30 d.e. Impulsive action- Exposed > CNT (always) // Compulsivity, perseveration- Exposed < CNT (exposure period); Exposed > CNT (Wash out) | Middlemore-Risher et al., 2010 | M+ |
| PND45<br>M ≈ 50%<br>ICR Mice | CPF 1-5 mg/kg GD13-17                                    | N.I.                                           | DAT                          | Compulsivity, perseveration- High exposed -CNT at longer delays (males) and early (females) // CA1 & DG & Prl & IL cells number- High exposed < CNT // Muscarinic binding at cortex & hippocampus- Exposed < CNT                                               | Chen et al., 2012              | M+ |
| PND200<br>M 100%<br>WR       | CPF_ 10-18, DFP_0.25-0.75 mg/kg/day from PND30-60        | ChE activity from brain & blood                | Water maze with reversal     | Compulsivity, inflexibility- High exposed > CNT (DFP) // Learning- High exposed < CNT (CPF), Exposed < CNT (DFP)                                                                                                                                               | Terry et al., 2012             | M+ |
| Adulthood<br>M 100%<br>LH    | CPF 250 mg/kg acute                                      | AChE activity; Function battery                | 5-CSRTT                      | Impulsive action- CPF = CNT // Compulsivity, perseveration- Exposed > CNT (BL); Amphetamine reduced compulsivity in CPF, no in CNT // DOPAC/DA & DOPAC+HVA/DA activity- Exposed > CNT (Hippocampus) // GABA & Glutamate activity- Exposed < CNT (Striatum)     | Montes de Oca et al., 2013     | M? |
